# Supplementary material
Source: Springer Nature journal article supplement (https://www.springermedizin.de/resource/supplementary/13256_2009_1257_MOESM8_ESM.pdf/9647356)

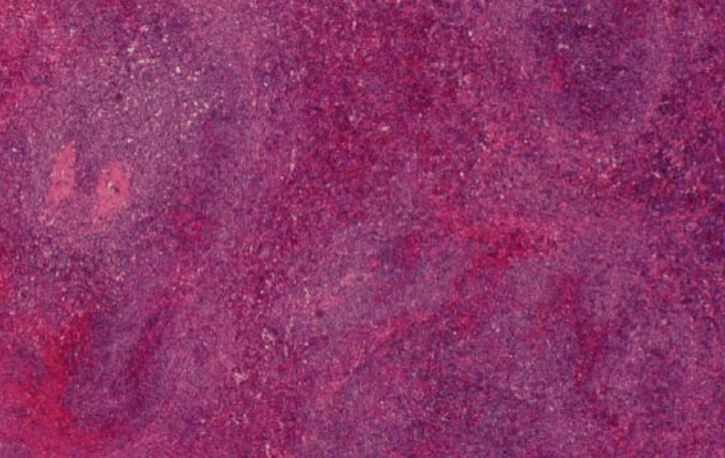

Supplement: MOESM8 [file 9647356]
